# Supplementary material for: Oral-Hygiene-Related Mobile Apps in the French App Stores: Assessment of Functionality and Quality
Source: MDPI journal article supplement (doi:10.3390/ijerph19127293), 2022-06-14
Supplement: s1 [file s1]

**Table S1.** STROBE Statement—checklist of items that should be included in reports of observational studies.

|                              | Item No | Recommendation                                                                                                                                                                                                                                                                                                                                                                                                                                 | Page No |
|------------------------------|---------|------------------------------------------------------------------------------------------------------------------------------------------------------------------------------------------------------------------------------------------------------------------------------------------------------------------------------------------------------------------------------------------------------------------------------------------------|---------|
| Title and abstract           | 1       | (a) Indicate the study’s design with a commonly used term in the title or the abstract                                                                                                                                                                                                                                                                                                                                                         | 1       |
|                              |         | (b) Provide in the abstract an informative and balanced summary of what was done and what was found                                                                                                                                                                                                                                                                                                                                            | 1       |
| Introduction                 |         |                                                                                                                                                                                                                                                                                                                                                                                                                                                |         |
| Background/rationale         | 2       | Explain the scientific background and rationale for the investigation being reported                                                                                                                                                                                                                                                                                                                                                           | 1-2     |
| Objectives                   | 3       | State specific objectives, including any prespecified hypotheses                                                                                                                                                                                                                                                                                                                                                                               | 2       |
| Methods                      |         |                                                                                                                                                                                                                                                                                                                                                                                                                                                |         |
| Study design                 | 4       | Present key elements of study design early in the paper                                                                                                                                                                                                                                                                                                                                                                                        | 2       |
| Setting                      | 5       | Describe the setting, locations, and relevant dates, including periods of recruitment, exposure, follow-up, and data collection                                                                                                                                                                                                                                                                                                                | 2-3     |
| Participants                 | 6       | (a) Cohort study—Give the eligibility criteria, and the sources and methods of selection of participants. Describe methods of follow-up<br>Case-control study—Give the eligibility criteria, and the sources and methods of case ascertainment and control selection. Give the rationale for the choice of cases and controls<br>Cross-sectional study—Give the eligibility criteria, and the sources and methods of selection of participants | 3       |
|                              |         | (b) Cohort study—For matched studies, give matching criteria and number of exposed and unexposed<br>Case-control study—For matched studies, give matching criteria and the number of controls per case                                                                                                                                                                                                                                         | NA      |
| Variables                    | 7       | Clearly define all outcomes, exposures, predictors, potential confounders, and effect modifiers. Give diagnostic criteria, if applicable                                                                                                                                                                                                                                                                                                       | 3       |
| Data sources/<br>measurement | 8*      | For each variable of interest, give sources of data and details of methods of assessment (measurement). Describe comparability of assessment methods if there is more than one group                                                                                                                                                                                                                                                           | 3-4     |
| Bias                         | 9       | Describe any efforts to address potential sources of bias                                                                                                                                                                                                                                                                                                                                                                                      | 3-4     |
| Study size                   | 10      | Explain how the study size was arrived at                                                                                                                                                                                                                                                                                                                                                                                                      | 3       |
| Quantitative variables       | 11      | Explain how quantitative variables were handled in the analyses. If applicable, describe which groupings were chosen and why                                                                                                                                                                                                                                                                                                                   | 3-4     |
| Statistical methods          | 12      | (a) Describe all statistical methods, including those used to control for confounding                                                                                                                                                                                                                                                                                                                                                          | 3-4     |
|                              |         | (b) Describe any methods used to examine subgroups and interactions                                                                                                                                                                                                                                                                                                                                                                            | 3-4     |
|                              |         | (c) Explain how missing data were addressed                                                                                                                                                                                                                                                                                                                                                                                                    | NA      |
|                              |         | (d) Cohort study—If applicable, explain how loss to follow-up was addressed<br>Case-control study—If applicable, explain how matching of cases and controls was addressed<br>Cross-sectional study—If applicable, describe analytical methods taking account of sampling strategy                                                                                                                                                              | NA      |
|                              |         | (e) Describe any sensitivity analyses                                                                                                                                                                                                                                                                                                                                                                                                          | NA      |

Continued on next page

|                          |     |                                                                                                                                                                                                              |       |
|--------------------------|-----|--------------------------------------------------------------------------------------------------------------------------------------------------------------------------------------------------------------|-------|
| <b>Results</b>           |     |                                                                                                                                                                                                              |       |
| Participants             | 13* | (a) Report numbers of individuals at each stage of study—eg numbers potentially eligible, examined for eligibility, confirmed eligible, included in the study, completing follow-up, and analysed            | 4     |
|                          |     | (b) Give reasons for non-participation at each stage                                                                                                                                                         | 4     |
|                          |     | (c) Consider use of a flow diagram                                                                                                                                                                           | NA    |
| Descriptive data         | 14* | (a) Give characteristics of study participants (eg demographic, clinical, social) and information on exposures and potential confounders                                                                     | 4     |
|                          |     | (b) Indicate number of participants with missing data for each variable of interest                                                                                                                          | NA    |
|                          |     | (c) <i>Cohort study</i> —Summarise follow-up time (eg, average and total amount)                                                                                                                             | NA    |
| Outcome data             | 15* | <i>Cohort study</i> —Report numbers of outcome events or summary measures over time                                                                                                                          | NA    |
|                          |     | <i>Case-control study</i> —Report numbers in each exposure category, or summary measures of exposure                                                                                                         | NA    |
|                          |     | <i>Cross-sectional study</i> —Report numbers of outcome events or summary measures                                                                                                                           | NA    |
| Main results             | 16  | (a) Give unadjusted estimates and, if applicable, confounder-adjusted estimates and their precision (eg, 95% confidence interval). Make clear which confounders were adjusted for and why they were included | 4-10  |
|                          |     | (b) Report category boundaries when continuous variables were categorized                                                                                                                                    | NA    |
|                          |     | (c) If relevant, consider translating estimates of relative risk into absolute risk for a meaningful time period                                                                                             | NA    |
| Other analyses           | 17  | Report other analyses done—eg analyses of subgroups and interactions, and sensitivity analyses                                                                                                               | NA    |
| <b>Discussion</b>        |     |                                                                                                                                                                                                              |       |
| Key results              | 18  | Summarise key results with reference to study objectives                                                                                                                                                     | 10-11 |
| Limitations              | 19  | Discuss limitations of the study, taking into account sources of potential bias or imprecision. Discuss both direction and magnitude of any potential bias                                                   | 11-12 |
| Interpretation           | 20  | Give a cautious overall interpretation of results considering objectives, limitations, multiplicity of analyses, results from similar studies, and other relevant evidence                                   | 12-13 |
| Generalisability         | 21  | Discuss the generalisability (external validity) of the study results                                                                                                                                        | 12-13 |
| <b>Other information</b> |     |                                                                                                                                                                                                              |       |
| Funding                  | 22  | Give the source of funding and the role of the funders for the present study and, if applicable, for the original study on which the present article is based                                                | NA    |

\*Give information separately for cases and controls in case-control studies and, if applicable, for exposed and unexposed groups in cohort and cross-sectional studies.

**Note:** An Explanation and Elaboration article discusses each checklist item and gives methodological background and published examples of transparent reporting. The STROBE checklist is best used in conjunction with this article (freely available on the Web sites of PLoS Medicine at <http://www.plosmedicine.org/>, Annals of Internal Medicine at <http://www.annals.org/>, and Epidemiology at <http://www.epidem.com/>). Information on the STROBE Initiative is available at [www.strobe-statement.org](http://www.strobe-statement.org).

**Table S2.** Characteristics of the raters, the hardware and the software used.

|                                      | <b>Rater 1</b>               | <b>Rater 2</b>                   | <b>Rater 3</b>  | <b>Rater 4</b>  | <b>Rater 5</b>             | <b>Rater 6</b>       | <b>Rater 7</b>   | <b>Rater 8</b>                 | <b>Rater 9</b>  | <b>Rater 10</b>              |
|--------------------------------------|------------------------------|----------------------------------|-----------------|-----------------|----------------------------|----------------------|------------------|--------------------------------|-----------------|------------------------------|
| <b>Year of experience as dentist</b> | 41                           | 24                               | Student         | Student         | 13                         | 6                    | 4                | 10                             | Student         | 6                            |
| <b>Affiliation</b>                   | Liberal and Hospital         | Liberal and Hospital             | University      | University      | Hospital                   | Liberal and Hospital | Liberal          | Hospital                       | University      | Liberal and Hospital         |
| <b>Scope of activity</b>             | Periodontist - Public health | General practice - Public health | NA <sup>1</sup> | NA <sup>1</sup> | Individual oral prevention | Public health        | General practice | Public health and Oral surgery | NA <sup>1</sup> | Periodontist - Public health |
| <b>Hardware (phone)</b>              | iphone 12 mini               | iphone 8                         | iphone          | iphone          | iPhone 11                  | Samsung galaxy s21   | iPhone 12        | iPhone SE                      | Oppo Reno 4     | Samsung galaxy A45           |
| <b>Software (iOS or Android)</b>     | iOS                          | iOS                              | iOS             | iOS             | iOS                        | Android              | iOS              | iOS                            | Android         | Android                      |

NA: Not applicable

**Table S3.** Developer, Score rating and Paid content of the 9 oral health-related mobile apps.

| App name                             | Developer                                | Rating in the iOS app store<br>(Nb of raters) | Rating in the Android app store<br>(Nb of raters) | Paid Content                                       |
|--------------------------------------|------------------------------------------|-----------------------------------------------|---------------------------------------------------|----------------------------------------------------|
| Colgate Connect                      | Colgate-Palmolive Compagny               | 4.3<br>(104)                                  | 3.1<br>(148)                                      | Free App - Need connected device to fully function |
| <i>Dental Hygiene Mastery NBDHE</i>  | Higher Learning Technologies             | NA                                            | NA                                                | Free with in-app purchases                         |
| Disney magic Timer by Oral-B         | Disney                                   | 4.3<br>(974)                                  | 4.4<br>(55000)                                    | Free App                                           |
| Kolibree                             | Kolibree                                 | 4.1<br>(28)                                   | 3.5<br>(173)                                      | Free App - Need connected device to fully function |
| <i>Mimizaaur se brosse les dents</i> | Shorokh Natalya                          | 4.5<br>(22)                                   | 4.6<br>(661)                                      | Free with in-app purchases                         |
| Oral-B                               | P&G Productions                          | 4,6<br>(10989)                                | 4.5<br>(67000)                                    | Free App - Need connected device to fully function |
| Preventeeth                          | Alexandre Gambiez                        | 5<br>(18)                                     | NA                                                | Free with in-app purchases                         |
| Santé orale - SOHDEV                 | Santé orale handicap dépendance vulnerab | 5<br>(1)                                      | 4.6<br>(9)                                        | Free App                                           |
| Truthbrush                           | Candibell                                | 5<br>(1)                                      | NA                                                | Free App - Need connected device to fully function |

**Table S4.** Brief description of the 9 oral health-related mobile apps included in the study.

| App name                            | Brief description of app                                                                                                                                                                                                                                                                                                                                                                                                                                                                                            |
|-------------------------------------|---------------------------------------------------------------------------------------------------------------------------------------------------------------------------------------------------------------------------------------------------------------------------------------------------------------------------------------------------------------------------------------------------------------------------------------------------------------------------------------------------------------------|
| Colgate Connect                     | This application aims to improve the quality of dental brushing by increasing the brushing time and brushing areas. By connecting the electric toothbrush, a personalized follow-up is proposed.                                                                                                                                                                                                                                                                                                                    |
| Dental Hygiene Mastery NBDHE        | This application offers questions and answers on oral hygiene based on dental hygienists' exam questions.                                                                                                                                                                                                                                                                                                                                                                                                           |
| Disney magic Timer by Oral-B        | This application aims to increase tooth brushing time in children by using Disney characters and fun games.                                                                                                                                                                                                                                                                                                                                                                                                         |
| Kolibree                            | This application aims to improve the quality of dental brushing by increasing the brushing time and brushing areas. By connecting the electric toothbrush, a personalized follow-up is proposed.                                                                                                                                                                                                                                                                                                                    |
| <i>Mimizaur se brosse les dents</i> | This application aims to learn how to brush your teeth through different cartoons whose main character is Mimizaur.                                                                                                                                                                                                                                                                                                                                                                                                 |
| Oral-B                              | This application aims to improve the quality of dental brushing by increasing the brushing time and brushing areas. By connecting the electric toothbrush, a personalized follow-up is proposed.                                                                                                                                                                                                                                                                                                                    |
| Preventeeth                         | This application aims to teach how to take care of your teeth, how to brush better, and how to avoid dental problems. It allows personalized and individual learning regardless of the toothbrush used. It proposes exercises and calculates a score related to the risk of having dental problems.                                                                                                                                                                                                                 |
| <i>Santé Orale - SOHDEV</i>         | This application has been designed to reduce the number of visits to the dentist and to introduce daily brushing for people with autism or other pervasive developmental disorders (PDD).                                                                                                                                                                                                                                                                                                                           |
| Truthbrush                          | This application aims to track daily events related to the toothbrush and represents them as a graph over time. The application displays the time of brushing, the duration and the coverage. Truthbrush knows the difference between brushing teeth, applying toothpaste and cleaning the brush. The app makes it easy to set goals and rewards, set up alerts and even share brushing data with your dentist. It works fully when attached to the Truthbrush device, which fits any manual or powered toothbrush. |

**Table S5.** Targets of the 9 oral health-related mobile apps included in the study.

[illegible]

**Table S6.** Theoretical background and strategies of the 9 oral health-related mobile apps included in the study.

|                                                           | Colgate Connect | Dental Hygiene Mastery NBDHE | Disney magic Timer by Oral-B | Kolibree | Mimizaur se brosse les dents | Oral-B | Preventeeth | Santé orale - SOHDEV | Truthbrush |
|-----------------------------------------------------------|-----------------|------------------------------|------------------------------|----------|------------------------------|--------|-------------|----------------------|------------|
| <b>Theoretical background/Strategies (all that apply)</b> |                 |                              |                              |          |                              |        |             |                      |            |
| Assessment                                                | X               | X                            |                              | X        |                              | X      | X           |                      | X          |
| Feedback                                                  | X               | X                            |                              | X        |                              | X      |             |                      | X          |
| Information/Education                                     | X               | X                            | X                            | X        | X                            | X      | X           | X                    | X          |
| Monitoring/Tracking                                       | X               | X                            | X                            | X        |                              | X      |             |                      | X          |
| Goal setting                                              | X               | X                            | X                            | X        |                              | X      | X           |                      | X          |
| Advice /Tips /Strategies /Skills training                 | X               | X                            |                              | X        |                              | X      | X           | X                    | X          |
| CBT - Behavioral (positive events)                        | X               |                              | X                            | X        |                              | X      | X           |                      | X          |
| CBT – Cognitive (thought challenging)                     |                 |                              |                              |          |                              |        |             |                      |            |
| ACT - Acceptance commitment therapy                       |                 |                              |                              |          |                              |        |             |                      |            |
| Mindfulness/Meditation                                    |                 |                              |                              |          |                              |        |             |                      |            |
| Relaxation                                                |                 |                              |                              |          |                              |        |             |                      |            |
| Gratitude                                                 | X               | X                            | X                            | X        |                              | X      | X           |                      | X          |
| Strengths based                                           | X               |                              |                              | X        |                              | X      | X           |                      | X          |

**Table S7.** Affiliations of the 9 oral health-related mobile apps included in the study.

|  |                              |   |   |   |   |   |   |   |   |
|--|------------------------------|---|---|---|---|---|---|---|---|
|  |                              |   |   |   |   |   |   |   |   |
|  | Unknown                      |   |   |   |   |   |   |   |   |
|  | Commercial                   | X | X | X | X | X | X |   | X |
|  | Government                   |   |   |   |   |   |   |   |   |
|  | Non-governmental association |   |   |   |   |   |   | X |   |

**Table S8.** Age group of the 9 oral health-related mobile apps included in the study.

|                            | Colgate Connect | Dental Hygiene Mastery NBDHE | Disney magic Timer by Oral-B | Kolibree | <i>Mimizaur se brosse les dents</i> | Oral-B | Preventeeth | <i>Santé orale - SOHDEV</i> | Truthbrush |
|----------------------------|-----------------|------------------------------|------------------------------|----------|-------------------------------------|--------|-------------|-----------------------------|------------|
| Age group (all that apply) |                 |                              |                              |          |                                     |        |             |                             |            |
| Children (under 12)        |                 |                              | X                            |          | X                                   |        |             | X                           |            |
| Adolescents (13-17)        | X               | X                            |                              | X        |                                     | X      | X           | X                           | X          |
| Young Adults (18-25)       | X               | X                            |                              | X        |                                     | X      | X           | X                           | X          |
| Adults                     | X               | X                            |                              | X        |                                     | X      | X           | X                           | X          |



**Table S10.** Mobile App Rating Scale (MARS) scoring by section.

| App Name                            | Data | Section A | Section B | Section C | Section D | Section ABCD | Section E | Section F |
|-------------------------------------|------|-----------|-----------|-----------|-----------|--------------|-----------|-----------|
| Colgate Connect                     | Mean | 3.62      | 4.3       | 4.09      | 3.43      | 3.78         | 2.57      | 2.98      |
|                                     | SD   | 0.30      | 0.30      | 0.15      | 0.39      | 0.26         | 0.45      | 0.72      |
| Dental Hygiene Mastery<br>NBDHE     | Mean | 2.68      | 3.97      | 3.80      | 3.53      | 3.43         | 2.07      | 2.08      |
|                                     | SD   | 0.61      | 0.55      | 0.59      | 0.17      | 0.35         | 0.78      | 0.74      |
| Disney magic Timer by Oral-B        | Mean | 3.58      | 4.52      | 4.56      | 2.88      | 3.72         | 2.15      | 2.23      |
|                                     | SD   | 0.57      | 0.54      | 0.16      | 0.35      | 0.30         | 0.81      | 0.56      |
| Kolibree                            | Mean | 3.24      | 4.00      | 3.72      | 3.33      | 3.52         | 1.75      | 2.31      |
|                                     | SD   | 0.44      | 0.56      | 0.46      | 0.35      | 0.29         | 0.55      | 0.69      |
| <i>Mimizaur se brosse les dents</i> | Mean | 2.72      | 3.50      | 2.99      | 2.48      | 2.86         | 1.5       | 1.78      |
|                                     | SD   | 0.21      | 0.54      | 0.52      | 0.34      | 0.22         | 0.61      | 0.47      |
| Oral-B                              | Mean | 3.38      | 4.37      | 4.06      | 3.33      | 3.70         | 2.62      | 3.15      |
|                                     | SD   | 0.62      | 0.45      | 0.56      | 0.61      | 0.45         | 0.61      | 0.62      |
| Preventeeth                         | Mean | 3.4       | 3.92      | 3.66      | 3.20      | 3.49         | 2.32      | 3.46      |
|                                     | SD   | 0.66      | 0.54      | 0.58      | 0.44      | 0.43         | 0.76      | 0.84      |
| <i>Santé orale - SOHDEV</i>         | Mean | 2.48      | 3.70      | 2.73      | 3.26      | 3.05         | 2.47      | 3.01      |
|                                     | SD   | 0.34      | 0.72      | 0.68      | 0.53      | 0.46         | 0.55      | 0.83      |
| Truthbrush                          | Mean | 2.84      | 3.87      | 3.70      | 3.00      | 3.26         | 1.90      | 2.55      |
|                                     | SD   | 0.37      | 0.50      | 0.50      | 0.48      | 0.36         | 0.67      | 0.75      |

**Table S11.** Mobile App Rating Scale (MARS) scoring by items.

| App Name                            | Data | Section A |        |        |        |        | Section B |        |        |        | Section C |         |         | Section D |         |         |         |         |         |         |
|-------------------------------------|------|-----------|--------|--------|--------|--------|-----------|--------|--------|--------|-----------|---------|---------|-----------|---------|---------|---------|---------|---------|---------|
|                                     |      | Item 1    | Item 2 | Item 3 | Item 4 | Item 5 | Item 6    | Item 7 | Item 8 | Item 9 | Item 10   | Item 11 | Item 12 | Item 13   | Item 14 | Item 15 | Item 16 | Item 17 | Item 18 | Item 19 |
| Colgate Connect                     | Mean | 3.20      | 3.3    | 3.8    | 3.8    | 4      | 4.6       | 4.1    | 4.2    | 4.3    | 4         | 4.4     | 3.9     | 3.9       | 3.9     | 4       | 3.6     | 4       | 1.2     | X       |
|                                     | SD   | 0.42      | 0.48   | 0.63   | 0.42   | 0.47   | 0.51      | 0.56   | 0.42   | 0.48   | 0         | 0.51    | 0.31    | 0.73      | 0.56    | 0       | 0.69    | 0.47    | 0.63    | X       |
| Dental Hygiene Mastery NBDHE        | Mean | 2.5       | 3.1    | 2.9    | 2.1    | 2.8    | 4.2       | 3.8    | 3.9    | 4      | 3.9       | 3.9     | 3.6     | 3.7       | 4       | 3.6     | 4       | 4       | 1.9     | X       |
|                                     | SD   | 1.26      | 1.10   | 0.87   | 0.73   | 1.13   | 0.63      | 0.91   | 0.73   | 0.47   | 0.87      | 0.56    | 0.69    | 0.67      | 0.47    | 0.51    | 0       | 0.47    | 0.56    | X       |
| Disney magic Timer by Oral-B        | Mean | 4.3       | 4.00   | 2.9    | 2.7    | 4      | 4.6       | 4.6    | 4.7    | 4.2    | 4.1       | 4.9     | 4.7     | 3.2       | 3.1     | 3       | 2.3     | 4.5     | 1.2     | X       |
|                                     | SD   | 0.82      | 0.81   | 0.87   | 1.05   | 0.47   | 0.96      | 0.51   | 0.48   | 0.63   | 0.31      | 0.31    | 0.48    | 1.03      | 0.31    | 0.47    | 0.82    | 0.70    | 0.63    | X       |
| Kolibree                            | Mean | 3.5       | 3.5    | 3      | 2.9    | 3.3    | 4         | 3.8    | 4.1    | 4.1    | 4         | 3.7     | 3.5     | 3.7       | 3.6     | 3.7     | 3.8     | 4       | 1.2     | X       |
|                                     | SD   | 0.70      | 0.97   | 1.24   | 0.87   | 0.94   | 0.47      | 0.91   | 0.73   | 0.56   | 0.66      | 0.48    | 0.70    | 0.67      | 0.51    | 0.67    | 0.78    | 0.47    | 0.63    | X       |
| <i>Mimizaur se brosse les dents</i> | Mean | 3.5       | 3.3    | 1.9    | 1.3    | 3.6    | 4         | 3.7    | 2.8    | 3.5    | 3.3       | 2.9     | 2.8     | 3.6       | 2.2     | 2.3     | 2.3     | 2.8     | 1.7     | X       |
|                                     | SD   | 0.70      | 0.48   | 0.56   | 0.67   | 0.69   | 0.47      | 1.05   | 1.13   | 0.52   | 0.82      | 0.87    | 0.42    | 0.69      | 0.42    | 0.67    | 0.67    | 0.78    | 0.48    | X       |
| Oral-B                              | Mean | 3.5       | 3.9    | 2.9    | 2.8    | 3.8    | 4.4       | 4.3    | 4.1    | 4.7    | 4         | 4.3     | 3.9     | 3.9       | 3.5     | 3.6     | 3.7     | 3.9     | 1.4     | X       |
|                                     | SD   | 0.97      | 0.99   | 0.87   | 0.78   | 0.78   | 0.69      | 0.67   | 0.56   | 0.48   | 0.66      | 0.67    | 0.73    | 1.10      | 0.70    | 0.69    | 0.48    | 1.10    | 0.84    | X       |
| Preventeeth                         | Mean | 3.9       | 4      | 3      | 2.4    | 3.7    | 3.5       | 4.3    | 4      | 3.9    | 3.7       | 3.8     | 3.5     | 3.4       | 3.1     | 3.8     | 3.2     | 4       | 1.7     | X       |
|                                     | SD   | 0.99      | 0.94   | 1.24   | 0.84   | 0.67   | 0.97      | 0.67   | 0.47   | 0.31   | 0.67      | 0.78    | 0.70    | 0.96      | 0.31    | 0.78    | 0.78    | 0.47    | 0.67    | X       |
| <i>Santé orale - SOHDEV</i>         | Mean | 3.10      | 3.3    | 1.4    | 1      | 3.6    | 3.9       | 4      | 3.3    | 3.6    | 2.7       | 2.7     | 2.8     | 3.4       | 3       | 3.4     | 3.4     | 3.5     | 2.9     | X       |
|                                     | SD   | 0.87      | 0.67   | 0.51   | 0      | 0.69   | 1.19      | 0.47   | 1.05   | 0.84   | 1.33      | 0.82    | 0.42    | 0.96      | 0.47    | 0.69    | 0.69    | 0.97    | 0.73    | X       |
| Truthbrush                          | Mean | 2.7       | 3      | 2.9    | 2.6    | 3      | 4.1       | 3.5    | 3.9    | 4      | 3.8       | 3.7     | 3.6     | 3.2       | 3.2     | 3.4     | 3.7     | 3.4     | 1.1     | X       |
|                                     | SD   | 0.82      | 0.81   | 0.87   | 0.51   | 0.47   | 0.31      | 1.17   | 0.56   | 0.47   | 0.42      | 0.67    | 0.69    | 0.91      | 0.42    | 0.96    | 0.82    | 0.84    | 0.31    | X       |

| App Name                            | Data | Section E |         |         |         | Mobile app specificities |           |           |                     |              |                 |
|-------------------------------------|------|-----------|---------|---------|---------|--------------------------|-----------|-----------|---------------------|--------------|-----------------|
|                                     |      | Item 20   | Item 21 | Item 22 | Item 23 | Awareness                | Knowledge | Attitudes | Intention to change | Help seeking | Behavior change |
| Colgate Connect                     | Mean | 3         | 3.1     | 1       | 3.2     | 2.9                      | 2.9       | 3.1       | 3.1                 | 2.7          | 3.2             |
|                                     | SD   | 0.47      | 1.19    | 0       | 0.63    | 0.87                     | 1.19      | 0.87      | 0.56                | 1.05         | 0.78            |
| Dental Hygiene Mastery NBDHE        | Mean | 2         | 2.2     | 1.4     | 2.7     | 1.8                      | 4.1       | 1.8       | 1.8                 | 1.5          | 1.5             |
|                                     | SD   | 0.66      | 1.61    | 0.84    | 0.67    | 1.22                     | 0.73      | 1.13      | 0.63                | 0.97         | 0.70            |
| Disney magic Timer by Oral-B        | Mean | 2.2       | 2.5     | 1.2     | 2.7     | 2.3                      | 1.7       | 2.5       | 2.5                 | 2            | 2.4             |
|                                     | SD   | 0.78      | 1.50    | 0.63    | 0.94    | 1.05                     | 0.67      | 0.70      | 0.97                | 0.81         | 0.69            |
| Kolibree                            | Mean | 1.5       | 2.2     | 1       | 2.3     | 2                        | 2.2       | 2.8       | 2.2                 | 2            | 2.7             |
|                                     | SD   | 0.70      | 1.54    | 0       | 0.82    | 0.81                     | 0.63      | 0.91      | 0.91                | 0.81         | 0.82            |
| <i>Mimizaur se brosse les dents</i> | Mean | 1.5       | 1.7     | 1       | 1.8     | 1.9                      | 1.1       | 2.1       | 1.9                 | 1.6          | 2.1             |
|                                     | SD   | 0.84      | 1.25    | 0       | 0.78    | 0.56                     | 0.31      | 0.99      | 0.97                | 0.51         | 0.87            |
| Oral-B                              | Mean | 2.9       | 3.2     | 1       | 3.4     | 3.7                      | 2.9       | 3.7       | 3.2                 | 1.8          | 3.6             |
|                                     | SD   | 0.73      | 0.91    | 0       | 0.96    | 0.82                     | 0.73      | 0.67      | 0.91                | 0.78         | 0.96            |
| Preventeeth                         | Mean | 2.8       | 2.2     | 1.2     | 3.1     | 3.7                      | 3.3       | 3.6       | 3.4                 | 3.4          | 3.4             |
|                                     | SD   | 0.91      | 1.13    | 0.63    | 1.10    | 0.82                     | 1.33      | 0.69      | 0.96                | 1.07         | 1.07            |
| <i>Santé orale - SOHDEV</i>         | Mean | 3.1       | 2.7     | 1       | 2.9     | 2.8                      | 3         | 3         | 3.2                 | 2.9          | 3.2             |
|                                     | SD   | 0.56      | 0.82    | 0       | 0.73    | 1.03                     | 0.47      | 0.66      | 1.13                | 1.19         | 1.13            |
| Truthbrush                          | Mean | 1.6       | 2.2     | 1       | 2.8     | 2.8                      | 2.4       | 2.6       | 2.3                 | 2.6          | 2.6             |
|                                     | SD   | 0.96      | 1.47    | 0       | 0.78    | 0.78                     | 0.84      | 1.07      | 0.94                | 0.96         | 0.84            |
